# Supplementary material for: TADF and X-ray Radioluminescence of New Cu(I) Halide Complexes: Different Halide Effects on These Processes
Source: MDPI journal article supplement (doi:10.3390/ijms24065145), 2023-03-07
Supplement: s1 [file s1]

## Supporting Information

### TADF and X-ray radioluminescence of new Cu(I) halide complexes: different halide effects on these processes

Alexander V. Artem'ev,<sup>1\*</sup> Andrey Yu. Baranov,<sup>1</sup> Alexey S. Berezin,<sup>1</sup> Dmitri V. Stass,<sup>2,3</sup> Christina Hettstedt,<sup>4</sup> Konstantin Karaghiosoff,<sup>4</sup> Irina Yu. Bagryanskaya<sup>5</sup>

<sup>1</sup> Nikolaev Institute of Inorganic Chemistry, 3, Acad. Lavrentiev Ave., Novosibirsk 630090, Russia

<sup>2</sup> Novosibirsk State University, 2 Pirogova St., Novosibirsk 630090, Russia

<sup>3</sup> Voevodsky Institute of Chemical Kinetics and Combustion SB RAS, 3 Institutskaya St., 630090 Novosibirsk, Russia

<sup>4</sup> Department of Chemistry, Ludwig-Maximilian University of Munich, Butenandtstr. 5–13, 81377 Munich, Germany

<sup>5</sup> N. N. Vorozhtsov Novosibirsk Institute of Organic Chemistry, SB RAS, 9, Acad. Lavrentiev Ave., Novosibirsk 630090, Russia

\*Authors for correspondence: chemisufarm@yandex.ru

#### Table of contents

|        |                                                 |
|--------|-------------------------------------------------|
| S2–4   | §1. Single crystal X-ray crystallography        |
| S4     | §2. Powder X-ray diffraction data               |
| S5     | §3. TG&DTA curves                               |
| S5     | §4. FT-IR spectra                               |
| S6–8   | §5. Absorption, excitation and emission spectra |
| S8–12  | §6. DFT computations                            |
| S12–14 | §7. X-Ray radioluminescence                     |
| S14    | §8. References                                  |

## §1. Single crystal X-ray crystallography

**Table S1.** Data collection and selected refinement parameters for the obtained complexes.

|                                                                                                                         | <b>1·2MeCN</b>                                                                                                                                   | <b>2·2MeCN</b>                                                                                                                                   | <b>3·2MeCN</b>                                                                                                                                  |
|-------------------------------------------------------------------------------------------------------------------------|--------------------------------------------------------------------------------------------------------------------------------------------------|--------------------------------------------------------------------------------------------------------------------------------------------------|-------------------------------------------------------------------------------------------------------------------------------------------------|
| CCDC number                                                                                                             | 2232003                                                                                                                                          | 2232004                                                                                                                                          | 2232005                                                                                                                                         |
| Chemical formula                                                                                                        | C <sub>36</sub> H <sub>36</sub> Cl <sub>2</sub> Cu <sub>2</sub> N <sub>6</sub> O <sub>2</sub> P <sub>2</sub> ·2(C <sub>2</sub> H <sub>3</sub> N) | C <sub>36</sub> H <sub>36</sub> Br <sub>2</sub> Cu <sub>2</sub> N <sub>6</sub> O <sub>2</sub> P <sub>2</sub> ·2(C <sub>2</sub> H <sub>3</sub> N) | C <sub>36</sub> H <sub>36</sub> Cu <sub>2</sub> I <sub>2</sub> N <sub>6</sub> O <sub>2</sub> P <sub>2</sub> ·2(C <sub>2</sub> H <sub>3</sub> N) |
| <i>M<sub>r</sub></i>                                                                                                    | 926.73                                                                                                                                           | 1015.65                                                                                                                                          | 1103.59                                                                                                                                         |
| Crystal system, space group                                                                                             | Triclinic, <i>P</i> $\bar{1}$                                                                                                                    | Triclinic, <i>P</i> $\bar{1}$                                                                                                                    | Triclinic, <i>P</i> $\bar{1}$                                                                                                                   |
| Temperature (K)                                                                                                         | 296 K                                                                                                                                            | 296 K                                                                                                                                            | 296 K                                                                                                                                           |
| <i>a</i> , <i>b</i> , <i>c</i> (Å)                                                                                      | 9.8206 (7), 10.2907 (8), 10.6856 (9)                                                                                                             | 9.8727 (5), 10.4105 (7), 10.6724 (7)                                                                                                             | 9.9668 (10), 10.5931 (11), 10.7190 (12)                                                                                                         |
| $\alpha$ , $\beta$ , $\gamma$ (°)                                                                                       | 96.972 (4), 100.172 (4), 102.192 (4)                                                                                                             | 98.032 (3), 99.656 (2), 101.538 (2)                                                                                                              | 99.745 (5), 98.886 (5), 101.072 (4)                                                                                                             |
| <i>V</i> (Å <sup>3</sup> )                                                                                              | 1024.72 (14)                                                                                                                                     | 1042.33 (11)                                                                                                                                     | 1074.0 (2)                                                                                                                                      |
| <i>Z</i>                                                                                                                | 1                                                                                                                                                | 1                                                                                                                                                | 1                                                                                                                                               |
| $\mu$ (mm <sup>-1</sup> )                                                                                               | 1.29                                                                                                                                             | 3.06                                                                                                                                             | 2.55                                                                                                                                            |
| Crystal size (mm)                                                                                                       | 0.30 × 0.15 × 0.06                                                                                                                               | 0.45 × 0.25 × 0.08                                                                                                                               | 0.50 × 0.10 × 0.02                                                                                                                              |
| <i>T<sub>min</sub></i> , <i>T<sub>max</sub></i>                                                                         | 0.815, 0.928                                                                                                                                     | 0.623, 0.862                                                                                                                                     | 0.631, 0.928                                                                                                                                    |
| No. of measured, independent and observed [ <i>I</i> > 2 <i>s</i> ( <i>I</i> )] reflections                             | 20022, 5063, 3647                                                                                                                                | 17523, 4071, 3726                                                                                                                                | 22851, 5729, 4400                                                                                                                               |
| <i>R<sub>int</sub></i>                                                                                                  | 0.035                                                                                                                                            | 0.045                                                                                                                                            | 0.062                                                                                                                                           |
| (sin $\theta$ /λ) <sub>max</sub> (Å <sup>-1</sup> )                                                                     | 0.671                                                                                                                                            | 0.617                                                                                                                                            | 0.707                                                                                                                                           |
| <i>R</i> [ <i>F</i> <sup>2</sup> > 2 <i>s</i> ( <i>F</i> <sup>2</sup> )], <i>wR</i> ( <i>F</i> <sup>2</sup> ), <i>S</i> | 0.038, 0.108, 1.03                                                                                                                               | 0.059, 0.175, 1.05                                                                                                                               | 0.055, 0.160, 1.05                                                                                                                              |
| No. of reflections                                                                                                      | 5063                                                                                                                                             | 4071                                                                                                                                             | 5729                                                                                                                                            |
| No. of parameters                                                                                                       | 254                                                                                                                                              | 254                                                                                                                                              | 253                                                                                                                                             |
| $\Delta\rho_{\max}$ , $\Delta\rho_{\min}$ (e Å <sup>-3</sup> )                                                          | 0.48, -0.35                                                                                                                                      | 1.34, -0.69                                                                                                                                      | 1.88, -1.88                                                                                                                                     |

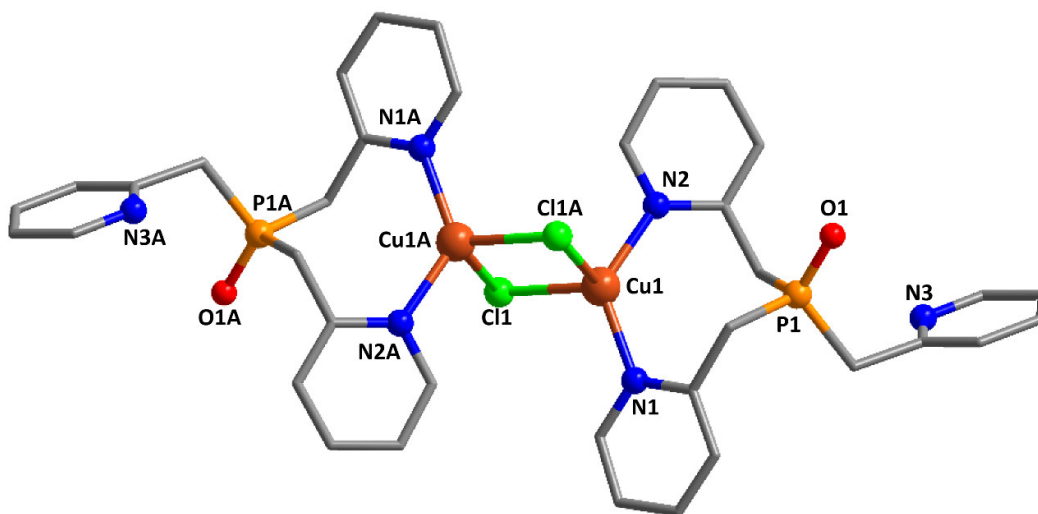

**Figure S1.** Structure of **1**·2MeCN according to single crystal XRD analysis (hydrogen atoms and solvent molecules are omitted for clarity). Selected bond length and angles: Cu1–Cu1A 3.1220(4), Cu1–N1 2.0173(19), Cu1–N2 2.030(2), Cu1–Cl1 2.3471(7), Cu1–Cl1A 2.5916(8), N1–Cu1–N2 128.01(7), N1–Cu1–Cl1 111.96(6), N2–Cu1–Cl1 108.38(6), N1–Cu1–Cl1A 103.09(6), N2–Cu1–Cl1A 99.29(6), Cl1–Cu1–Cl1A 101.76(2), Cu1–Cl1–Cu1A 78.24(2). Symmetry code: A(–x, –y, –z).

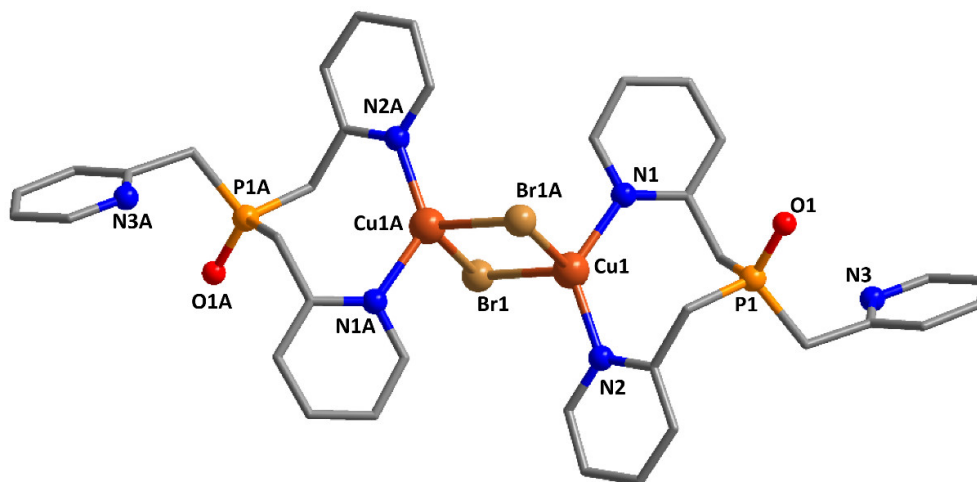

**Figure S2.** Structure of **2**·2MeCN according to single crystal XRD analysis (hydrogen atoms and solvent molecules are omitted for clarity). Selected bond length and angles: Cu1–Cu1A 3.2239(11), Br1–Cu1 2.4894(11), Br1–Cu1A 2.6973(14), Cu1–N2 2.019(5), Cu1–N1 2.025(6), Cu1–Br1–Cu1A 76.75(4), N2–Cu1–N1 128.6(2), N2–Cu1–Br1 111.92(15), N1–Cu1–Br1 105.57(17), N2–Cu1–Br1A 104.22(16), N1–Cu1–Br1A 99.90(17), Br1–Cu1–Br1A 103.25(4). Symmetry code: A(–1–x, 1–y, –z).

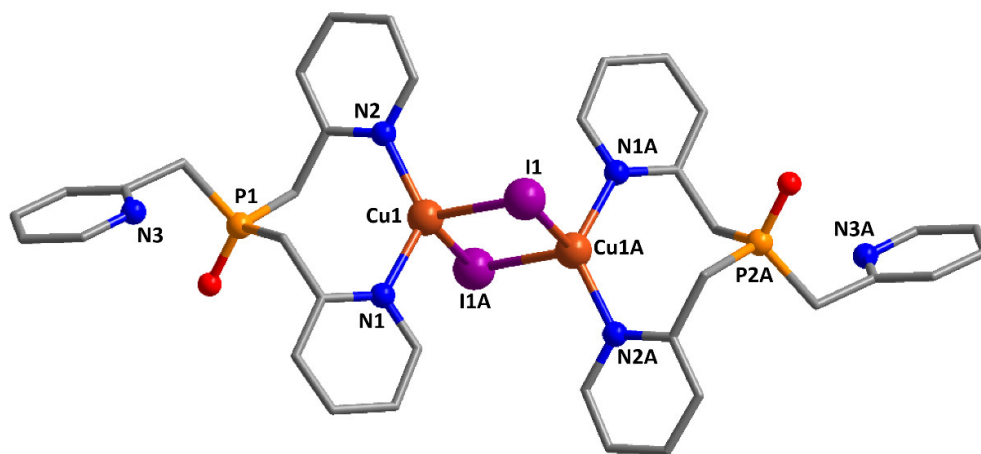

**Figure S3.** Structure of **3·2MeCN** according to single crystal XRD analysis (hydrogen atoms and solvent molecules are omitted for clarity). Selected bond length and angles: Cu1–Cu1A 3.2739(8), I1–Cu1 2.6612(7), I1–Cu1A 2.7919(8), Cu1–N2 2.035(4), Cu1–N1 2.048(4), Cu1–I1–Cu1A 73.75(2), N2–Cu1–N1 127.28(15), N2–Cu1–I1 111.59(11), N1–Cu1–I1 102.46(11), N2–Cu1–I1A 105.91(11), N1–Cu1–I1A 101.46(11), I1–Cu1–I1A 106.25(2). Symmetry code: A(2-x, 2-y, 2-z).

## §2. Powder X-ray diffraction data

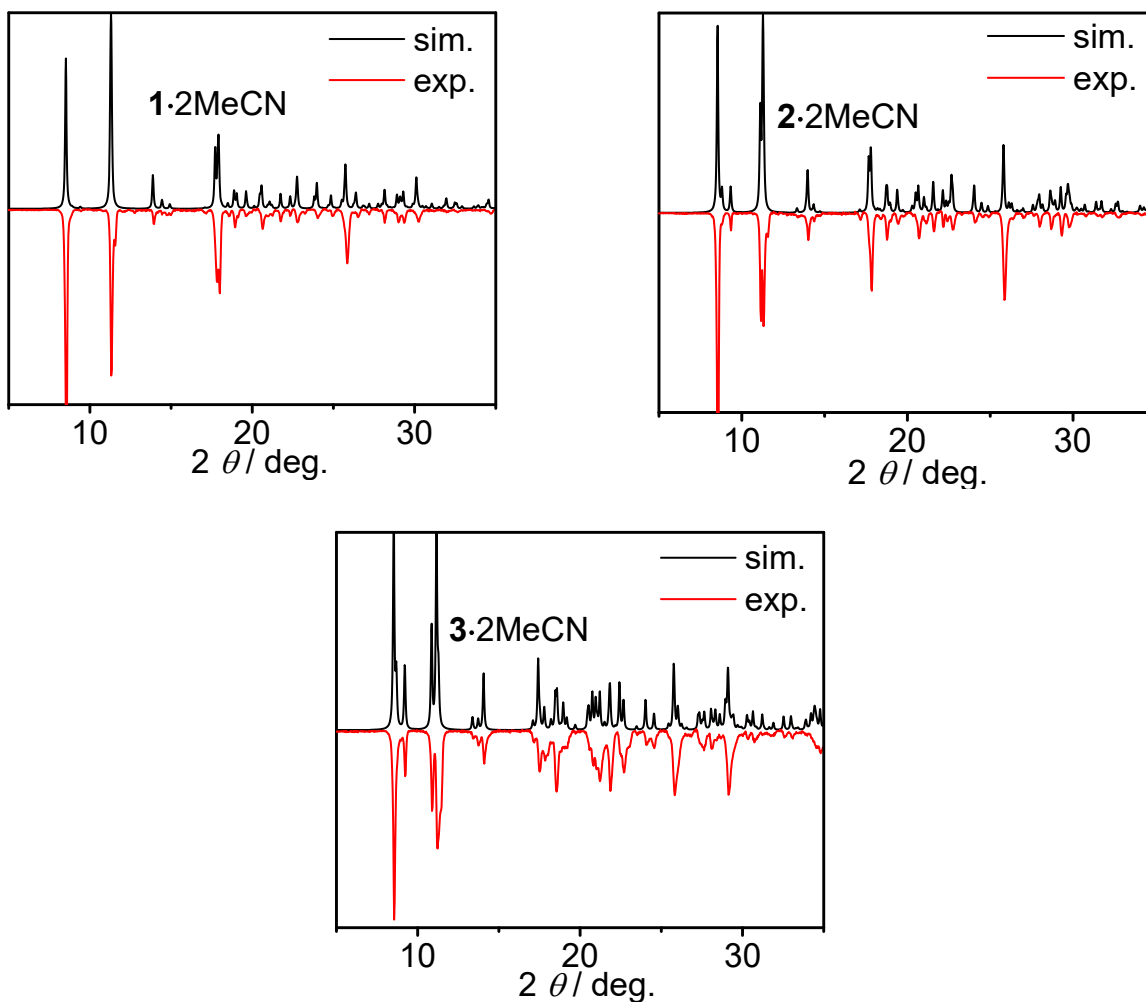

**Figure S4.** Experimental and simulated PXRD patterns of the synthesized compounds.

### §3. TG&DTA curves

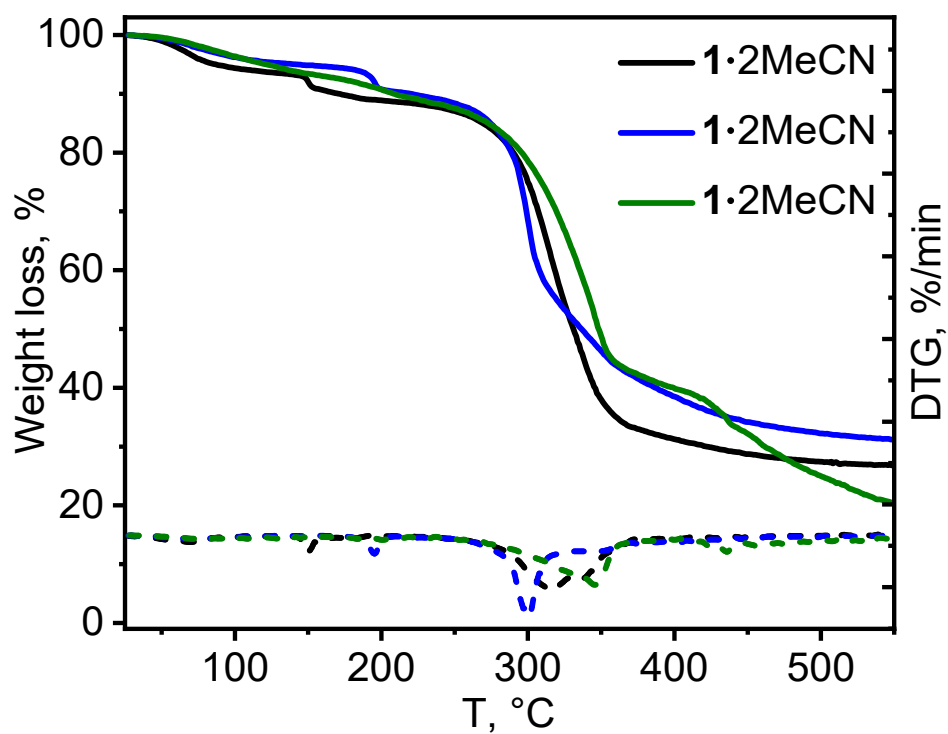

Figure S5. TGA and DTG curves for the synthesized compounds.

### §4. FT-IR spectra

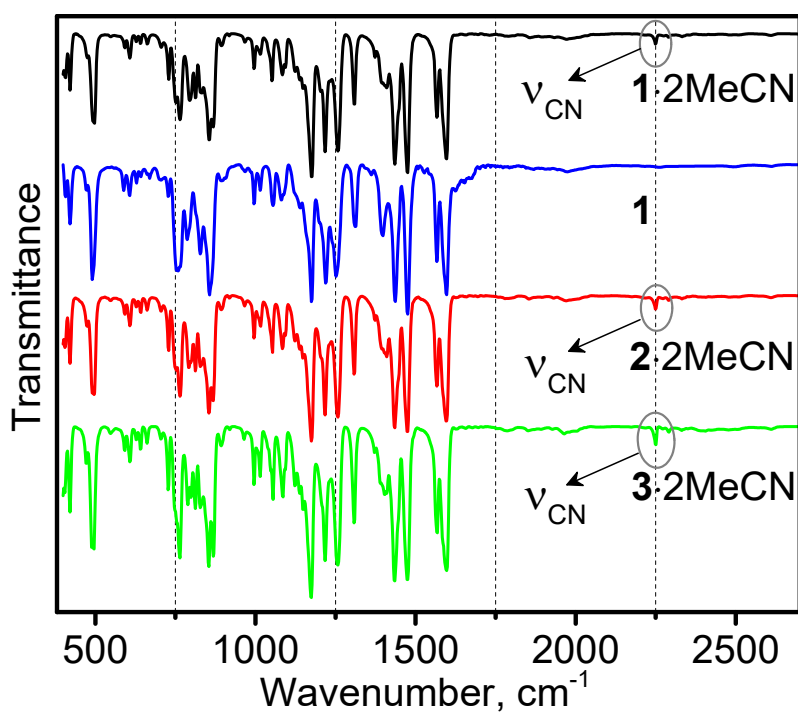

Figure S6. mid-IR spectra of the synthesized compounds.

## §5. Absorption, excitation and emission spectra

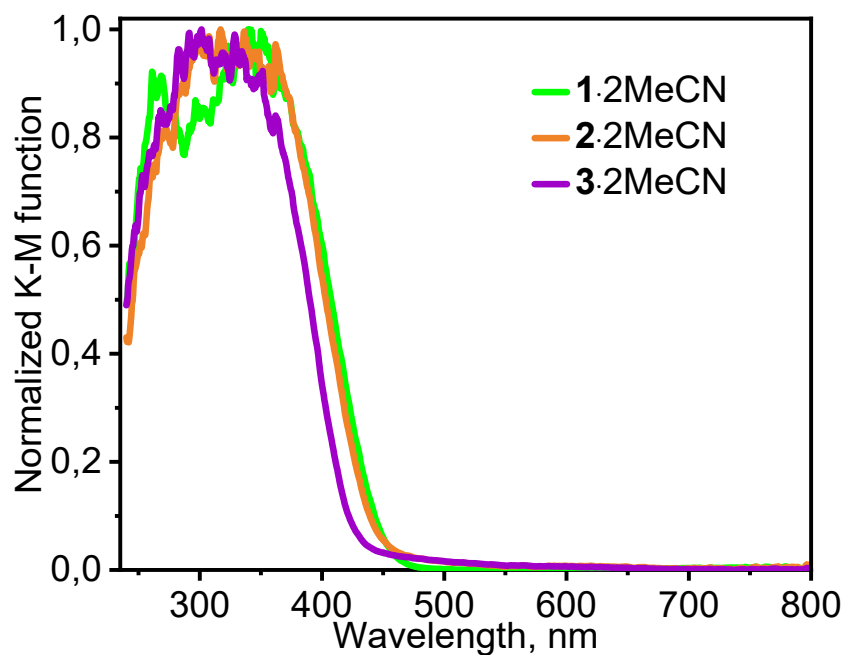

**Figure S7.** Absorption spectra (plotted as Kubelka-Munk function) of the samples.

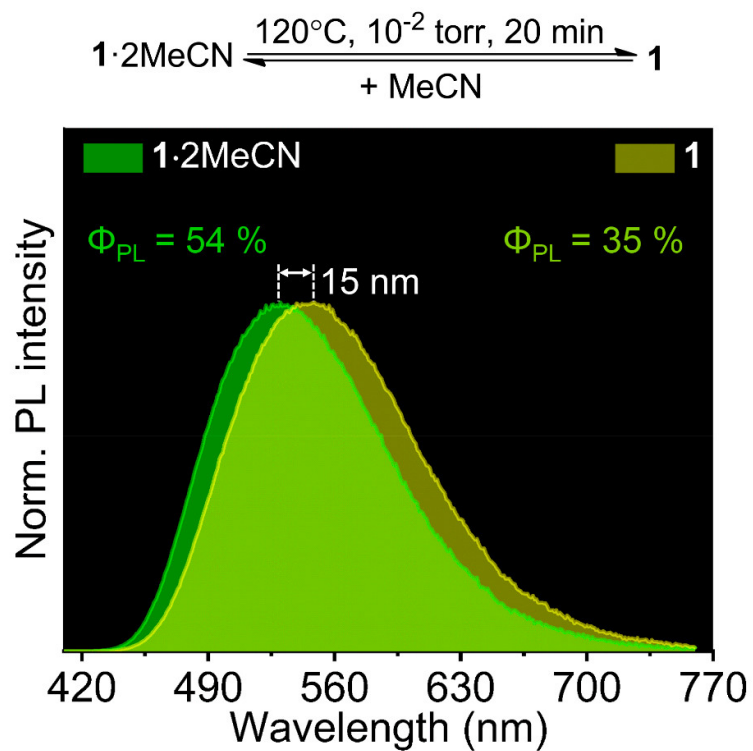

**Figure S8.** Evolution of solid-state emission properties upon desolvation of  $1 \cdot 2\text{MeCN}$ .

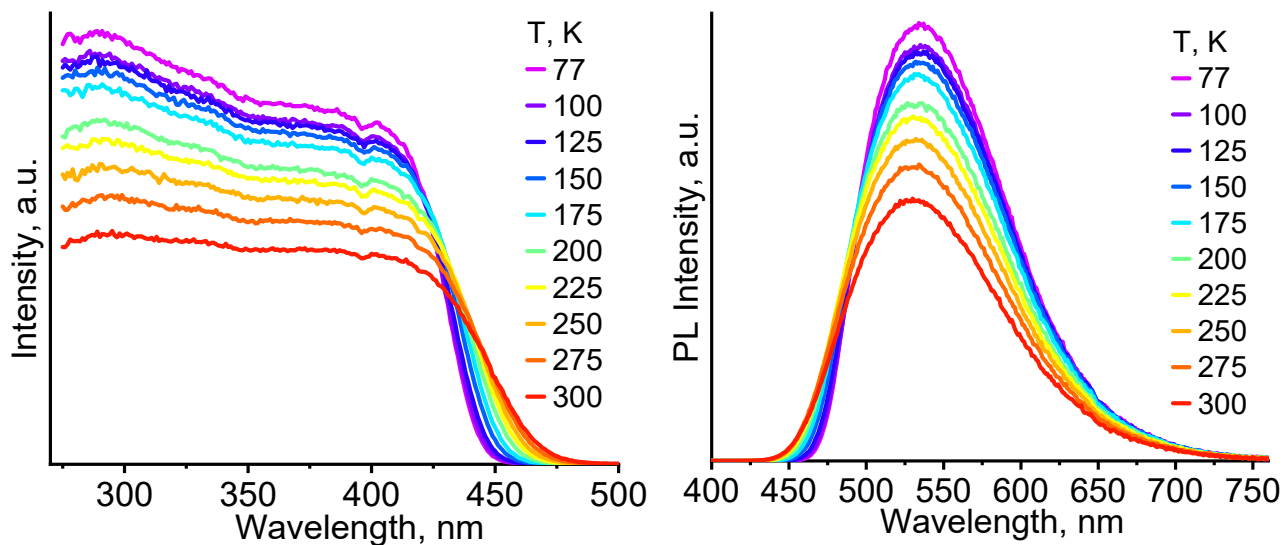

**Figure S9.** Temperature-dependent emission (left,  $\lambda_{\text{ex}} = 390$  nm) and excitation (right,  $\lambda_{\text{em}} = 535$  nm) spectra of  $1 \cdot 2\text{MeCN}$ .

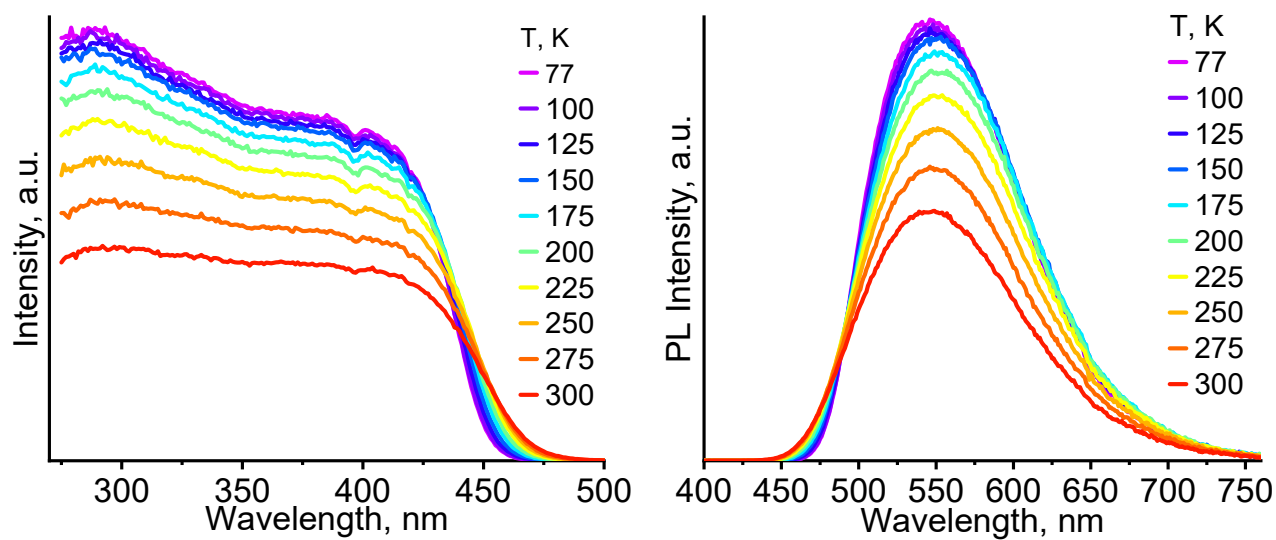

**Figure S10.** Temperature-dependent emission (left,  $\lambda_{\text{ex}} = 390$  nm) and excitation (right,  $\lambda_{\text{em}} = 545$  nm) spectra of **1**.

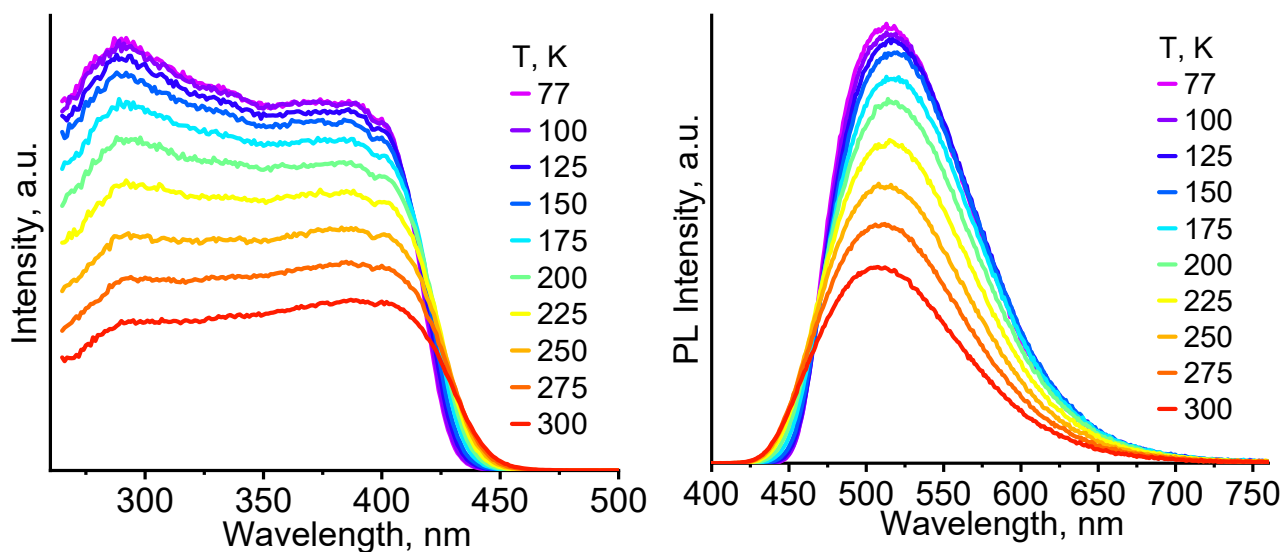

**Figure S11.** Temperature-dependent emission (left,  $\lambda_{\text{ex}} = 390$  nm) and excitation (right,  $\lambda_{\text{em}} = 530$  nm) spectra of **2**·2MeCN.

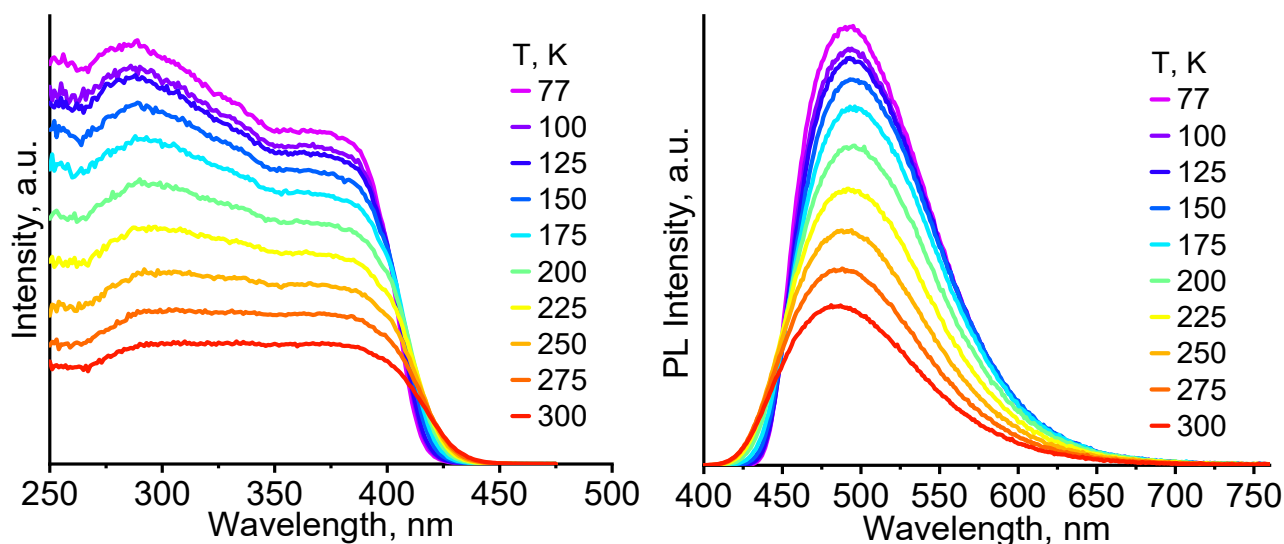

**Figure S12.** Temperature-dependent emission (left,  $\lambda_{\text{ex}} = 390$  nm) and excitation (right,  $\lambda_{\text{em}} = 485$  nm) spectra of **3**·2MeCN.

## §6. DFT computations

DFT and TD-DFT computations of complex  $[\text{Cu}_2\text{Cl}_2(\text{Pic}_3\text{PO})_2]$  (**1**) were performed in gas phase using Gaussian 09 program [1]. The structures of the  $S_0$  and  $T_1$  states of **1** were fully optimized using B3LYP [2] hybrid functional coupled with the def2-TZVPP basis set [3]. No imaginary frequencies were found in all optimized structures. The absorption spectrum was computed using time-dependent DFT (TD-DFT) [4] calculations with the optimized ground state ( $S_0$ ) geometry of **1**.

**Table S2.** Cartesian coordinates for gas phase  $S_0$  and  $T_1$  state geometries of **1** optimized at the B3LYP/def2TZVP level.

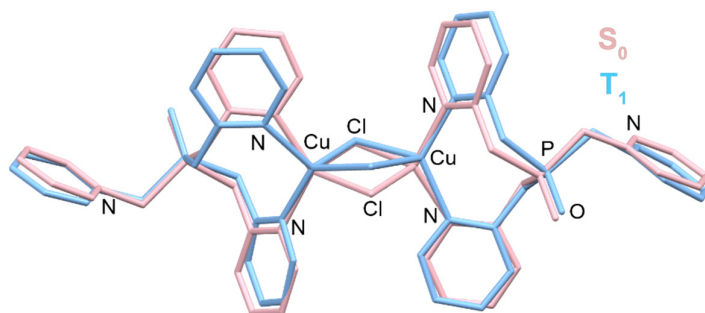

| Ground state ( $S_0$ ) |              |              |              | Lowest triplet excited state ( $T_1$ ) |               |              |              |
|------------------------|--------------|--------------|--------------|----------------------------------------|---------------|--------------|--------------|
| Cu                     | 0.854573000  | 0.825160000  | 0.947577000  | Cu                                     | -1.483430000  | 0.140457000  | 0.441863000  |
| Cl                     | -0.827896000 | -0.784675000 | 1.522356000  | Cl                                     | 0.284179000   | 0.711654000  | 1.834905000  |
| P                      | 3.413837000  | 3.789221000  | 1.574176000  | P                                      | -5.290682000  | -0.082764000 | -1.043579000 |
| N                      | 4.153808000  | 4.935080000  | 4.885786000  | N                                      | -8.177311000  | -0.778817000 | 0.811760000  |
| N                      | 0.061191000  | 2.714525000  | 1.458892000  | N                                      | -2.433753000  | -1.527739000 | 0.311124000  |
| O                      | 4.707309000  | 3.842362000  | 0.848628000  | O                                      | -5.726704000  | 1.072631000  | -1.872597000 |
| N                      | 2.797237000  | 0.265591000  | 1.455020000  | N                                      | -2.871278000  | 1.693918000  | 0.861748000  |
| C                      | 6.339858000  | 5.736762000  | 5.456696000  | C                                      | -10.345414000 | 0.117674000  | 0.316256000  |
| C                      | -1.140548000 | 2.731632000  | 2.052851000  | C                                      | -2.072913000  | -2.453107000 | 1.287263000  |
| H                      | -1.524711000 | 1.762310000  | 2.346794000  | H                                      | -1.537759000  | -2.056797000 | 2.140498000  |
| C                      | -1.860523000 | 3.896604000  | 2.262283000  | C                                      | -2.362686000  | -3.781945000 | 1.183786000  |
| H                      | -2.825350000 | 3.854624000  | 2.747583000  | H                                      | -2.053434000  | -4.441971000 | 1.984077000  |
| C                      | -1.317000000 | 5.098239000  | 1.827326000  | C                                      | -3.067782000  | -4.275886000 | 0.057833000  |
| H                      | -1.852537000 | 6.029176000  | 1.958942000  | H                                      | -3.290918000  | -5.324951000 | -0.059224000 |
| C                      | -0.072626000 | 5.085289000  | 1.217605000  | C                                      | -3.513544000  | -3.318823000 | -0.877896000 |
| H                      | 0.376037000  | 6.002943000  | 0.862627000  | H                                      | -4.114276000  | -3.628764000 | -1.724899000 |
| C                      | 0.605672000  | 3.876591000  | 1.053581000  | C                                      | -3.224955000  | -1.983614000 | -0.747644000 |
| C                      | 1.968505000  | 3.825513000  | 0.428102000  | C                                      | -3.790356000  | -0.946569000 | -1.665714000 |
| H                      | 2.143088000  | 4.702475000  | -0.197487000 | H                                      | -4.083551000  | -1.388007000 | -2.619772000 |
| H                      | 2.055765000  | 2.944386000  | -0.212375000 | H                                      | -3.063829000  | -0.162786000 | -1.895794000 |
| C                      | 3.226762000  | 2.330264000  | 2.679217000  | C                                      | -4.939115000  | 0.368475000  | 0.716265000  |
| H                      | 3.808741000  | 2.569896000  | 3.570044000  | H                                      | -5.912193000  | 0.432089000  | 1.203298000  |
| H                      | 2.181635000  | 2.244718000  | 2.975150000  | H                                      | -4.377201000  | -0.443580000 | 1.171720000  |
| C                      | 3.701416000  | 1.039340000  | 2.079348000  | C                                      | -4.217964000  | 1.670551000  | 0.843067000  |
| C                      | 3.197308000  | -0.912851000 | 0.956288000  | C                                      | -2.242635000  | 2.875461000  | 0.993442000  |
| H                      | 2.428233000  | -1.502801000 | 0.478158000  | H                                      | -1.163752000  | 2.830883000  | 1.033686000  |
| C                      | 4.502707000  | -1.364265000 | 1.036836000  | C                                      | -2.911320000  | 4.079754000  | 1.091565000  |
| H                      | 4.767966000  | -2.325690000 | 0.620629000  | H                                      | -2.351941000  | 4.997913000  | 1.197349000  |
| C                      | 5.446880000  | -0.553106000 | 1.652888000  | C                                      | -4.299434000  | 4.068814000  | 1.049313000  |
| H                      | 6.481575000  | -0.861134000 | 1.723631000  | H                                      | -4.863830000  | 4.989656000  | 1.112641000  |
| C                      | 5.039557000  | 0.660323000  | 2.179692000  | C                                      | -4.950804000  | 2.856843000  | 0.927027000  |
| H                      | 5.744645000  | 1.322284000  | 2.661324000  | H                                      | -6.028672000  | 2.806478000  | 0.884243000  |
| C                      | 3.163361000  | 5.229230000  | 2.697301000  | C                                      | -6.576555000  | -1.396352000 | -0.898514000 |
| H                      | 3.055096000  | 6.095329000  | 2.041558000  | H                                      | -6.627081000  | -1.863629000 | -1.883506000 |
| H                      | 2.238700000  | 5.100446000  | 3.258282000  | H                                      | -6.239347000  | -2.143658000 | -0.181666000 |
| C                      | 4.308747000  | 5.428512000  | 3.652323000  | C                                      | -7.919852000  | -0.855236000 | -0.499544000 |
| C                      | 5.149097000  | 5.091188000  | 5.759746000  | C                                      | -9.361836000  | -0.305294000 | 1.199559000  |
| H                      | 4.982065000  | 4.679766000  | 6.749123000  | H                                      | -9.530393000  | -0.265513000 | 2.270326000  |
| C                      | 6.504761000  | 6.236092000  | 4.170582000  | C                                      | -10.072335000 | 0.052767000  | -1.044549000 |
| H                      | 7.420613000  | 6.736857000  | 3.885337000  | H                                      | -10.804139000 | 0.380450000  | -1.771339000 |
| C                      | 5.478459000  | 6.078889000  | 3.253105000  | C                                      | -8.844425000  | -0.436195000 | -1.459352000 |

|    |              |              |              |    |               |              |              |
|----|--------------|--------------|--------------|----|---------------|--------------|--------------|
| H  | 5.579323000  | 6.434354000  | 2.237584000  | H  | -8.592446000  | -0.486282000 | -2.509208000 |
| Cu | -0.854573000 | -0.825160000 | -0.947577000 | Cu | 1.685879000   | 0.185830000  | -0.232780000 |
| Cl | 0.827896000  | 0.784675000  | -1.522356000 | Cl | -0.296869000  | 0.209533000  | -1.607551000 |
| P  | -3.413837000 | -3.789221000 | -1.574176000 | P  | 5.443472000   | 0.141429000  | 0.878398000  |
| N  | -4.153808000 | -4.935080000 | -4.885786000 | N  | 8.007505000   | -0.052068000 | -1.659424000 |
| N  | -0.061191000 | -2.714525000 | -1.458892000 | N  | 2.712704000   | 1.965293000  | -0.495727000 |
| O  | -4.707309000 | -3.842362000 | -0.848628000 | O  | 5.902627000   | -0.655516000 | 2.042112000  |
| N  | -2.797237000 | -0.265591000 | -1.455020000 | N  | 2.490250000   | -1.684371000 | 0.004153000  |
| C  | -6.339858000 | -5.736762000 | -5.456696000 | C  | 10.007080000  | -1.311898000 | -1.259186000 |
| C  | 1.140548000  | -2.731632000 | -2.052851000 | C  | 2.275908000   | 2.805354000  | -1.445485000 |
| H  | 1.524711000  | -1.762310000 | -2.346794000 | H  | 1.465302000   | 2.434421000  | -2.059186000 |
| C  | 1.860523000  | -3.896604000 | -2.262283000 | C  | 2.801560000   | 4.072871000  | -1.630552000 |
| H  | 2.825350000  | -3.854624000 | -2.747583000 | H  | 2.410844000   | 4.709972000  | -2.410917000 |
| C  | 1.317000000  | -5.098239000 | -1.827326000 | C  | 3.820845000   | 4.495308000  | -0.787906000 |
| H  | 1.852537000  | -6.029176000 | -1.958942000 | H  | 4.252087000   | 5.482120000  | -0.890890000 |
| C  | 0.072626000  | -5.085289000 | -1.217605000 | C  | 4.274357000   | 3.631132000  | 0.195758000  |
| H  | -0.376037000 | -6.002943000 | -0.862627000 | H  | 5.059315000   | 3.934126000  | 0.874817000  |
| C  | -0.605672000 | -3.876591000 | -1.053581000 | C  | 3.707408000   | 2.362560000  | 0.320168000  |
| C  | -1.968505000 | -3.825513000 | -0.428102000 | C  | 4.182759000   | 1.399856000  | 1.368139000  |
| H  | -2.143088000 | -4.702475000 | 0.197487000  | H  | 4.649588000   | 1.932979000  | 2.197957000  |
| H  | -2.055765000 | -2.944386000 | 0.212375000  | H  | 3.341513000   | 0.838286000  | 1.778842000  |
| C  | -3.226762000 | -2.330264000 | -2.679217000 | C  | 4.738578000   | -0.864773000 | -0.490843000 |
| H  | -3.808741000 | -2.569896000 | -3.570044000 | H  | 5.601104000   | -1.296136000 | -1.000190000 |
| H  | -2.181635000 | -2.244718000 | -2.975150000 | H  | 4.236811000   | -0.202356000 | -1.196278000 |
| C  | -3.701416000 | -1.039340000 | -2.079348000 | C  | 3.808028000   | -1.955058000 | -0.042815000 |
| C  | -3.197308000 | 0.912851000  | -0.956288000 | C  | 1.642739000   | -2.667523000 | 0.347664000  |
| H  | -2.428233000 | 1.502801000  | -0.478158000 | H  | 0.591476000   | -2.418089000 | 0.349173000  |
| C  | -4.502707000 | 1.364265000  | -1.036836000 | C  | 2.063469000   | -3.943028000 | 0.680203000  |
| H  | -4.767966000 | 2.325690000  | -0.620629000 | H  | 1.332373000   | -4.693317000 | 0.943796000  |
| C  | -5.446880000 | 0.553106000  | -1.652888000 | C  | 3.423825000   | -4.216586000 | 0.665907000  |
| H  | -6.481575000 | 0.861134000  | -1.723631000 | H  | 3.794996000   | -5.197437000 | 0.931395000  |
| C  | -5.039557000 | -0.660323000 | -2.179692000 | C  | 4.303111000   | -3.211484000 | 0.297755000  |
| H  | -5.744645000 | -1.322284000 | -2.661324000 | H  | 5.368946000   | -3.386593000 | 0.275428000  |
| C  | -3.163361000 | -5.229230000 | -2.697301000 | C  | 6.795292000   | 1.104651000  | 0.083409000  |
| H  | -3.055096000 | -6.095329000 | -2.041558000 | H  | 7.117503000   | 1.825235000  | 0.838100000  |
| H  | -2.238700000 | -5.100446000 | -3.258282000 | H  | 6.406342000   | 1.650156000  | -0.775275000 |
| C  | -4.308747000 | -5.428512000 | -3.652323000 | C  | 7.949055000   | 0.243164000  | -0.356471000 |
| C  | -5.149097000 | -5.091188000 | -5.759746000 | C  | 9.016188000   | -0.810002000 | -2.091716000 |
| H  | -4.982065000 | -4.679766000 | -6.749123000 | H  | 9.029298000   | -1.023267000 | -3.154779000 |
| C  | -6.504761000 | -6.236092000 | -4.170582000 | C  | 9.935540000   | -1.016613000 | 0.096567000  |
| H  | -7.420613000 | -6.736857000 | -3.885337000 | H  | 10.679928000  | -1.395208000 | 0.784566000  |
| C  | -5.478459000 | -6.078889000 | -3.253105000 | C  | 8.891708000   | -0.230513000 | 0.558452000  |
| H  | -5.579323000 | -6.434354000 | -2.237584000 | H  | 8.790547000   | 0.002629000  | 1.608823000  |
| H  | -7.112968000 | -5.839812000 | -6.205499000 | H  | 10.806224000  | -1.917959000 | -1.662885000 |
| H  | 7.112968000  | 5.839812000  | 6.205499000  | H  | -11.291903000 | 0.487608000  | 0.685578000  |

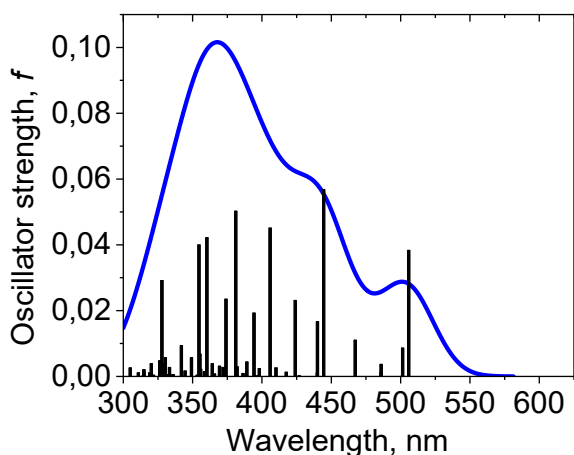

**Figure S13.** TD-TDF simulated absorption spectrum of **1**.

**Table S3.** Calculated (TD-B3LYP/def2TZVP) energies and characters of the main excitations ( $f > 0.002$ ) of **1**.

| E, eV  | $f$    | Transitions (main contributions)                   | Character |
|--------|--------|----------------------------------------------------|-----------|
| 2.4514 | 0.0209 | HOMO-1 → LUMO (24.7%)<br>HOMO → LUMO (64.6%)       | (M+X)LCT  |
| 2.4729 | 0.0047 | HOMO-1 → LUMO (53.8%)<br>HOMO → LUMO (29.3%)       | (M+X)LCT  |
| 2.6534 | 0.006  | HOMO → LUMO+3 (66.7%)                              | (M+X)LCT  |
| 2.7897 | 0.0310 | HOMO-1 → LUMO+3 (64.4%)                            | (M+X)LCT  |
| 2.8177 | 0.0091 | HOMO-3 → LUMO+2 (22.9%)<br>HOMO-2 → LUMO+3 (32.6%) | (M+X)LCT  |
| 2.9239 | 0.0126 | HOMO-5 → LUMO+1 (10.9%)<br>HOMO-4 → LUMO+1 (64.2%) | (M+X)LCT  |
| 3.0546 | 0.0246 | HOMO-5 → LUMO+1 (58.1%)<br>HOMO-4 → LUMO+1 (17.3%) | (M+X)LCT  |
| 3.1446 | 0.0105 | HOMO-6 → LUMO+1 (40.9%)<br>HOMO-4 → LUMO+2 (29.9%) | (M+X)LCT  |
| 3.1865 | 0.0024 | HOMO-3 → LUMO+2 42.7%<br>HOMO-2 → LUMO+3 34.1%     | (M+X)LCT  |
| 3.2535 | 0.0274 | HOMO-7 → LUMO (61.4%)                              | (M+X)LCT  |
| 3.3145 | 0.0128 | HOMO-6 → LUMO+2 (34.1%)<br>HOMO-5 → LUMO+2 (15.6%) | (M+X)LCT  |
| 3.4043 | 0.0021 | HOMO-4 → LUMO+6 (73.6%)                            | (M+X)LCT  |
| 3.4415 | 0.0023 | HOMO-5 → LUMO+2 (27.7%)<br>HOMO-6 → LUMO+2 (25.1%) | (M+X)LCT  |
| 3.4902 | 0.0037 | HOMO-7 → LUMO+3 (32.6%)<br>HOMO → LUMO+8 (19.9%)   | (M+X)LCT  |
| 3.4966 | 0.0218 | HOMO-8 → LUMO (43.6%)<br>HOMO-5 → LUMO+2 (23.2%)   | (M+X)LCT  |
| 3.5509 | 0.0031 | HOMO-5 → LUMO+6 (68.0%)                            | (M+X)LCT  |
| 3.6259 | 0.0051 | HOMO-9 → LUMO+1 (76.9%)                            | (M+X)LCT  |

|        |        |                          |          |
|--------|--------|--------------------------|----------|
| 3.7526 | 0.0031 | HOMO-5 -> LUMO+4 (60.1%) | (M+X)LCT |
| 3.7815 | 0.0159 | HOMO-8 -> LUMO+3 (52.3%) | (M+X)LCT |
| 3.7998 | 0.0026 | HOMO-6 -> LUMO+4 (71.1%) | (M+X)LCT |

## §7. X-Ray radioluminescence

X-ray radioluminescence (RL) spectra were recorded on a home-built spectrometer [5] following the earlier developed protocol for powder samples [6]; further technical details on possible experimental artifacts and spectral processing can be found in ref [7]. The sample of neat solid in the form of an island of finely ground powder with dimensions 3 x 8 mm and thickness of about 0.1 mm, applied via a stencil on a vertical aluminum plate with polypropylene-based double-sided Scotch tape, was directly exposed to the incident X-ray beam (unfiltered bremsstrahlung from a CW X-ray tube 2,5BSV-27-Mo, Svetlana, St. Petersburg, Russia, 40 kV x 20 mA, sample distance to anode 210 mm) and to the light-collecting optics of the detection system comprising a quartz optical imaging system, a grating monochromator (MDR-206, LOMO Photonics, St Petersburg, Russia, objective focus length 180 mm, grating 1200 lines per mm, inverse linear dispersion  $4.3 \text{ nm mm}^{-1}$ ) with slits set to 2.2 mm/2.2 mm (spectral resolution about 10 nm), and a Hamamatsu H10493-012 photosensor module. All experiments were performed at ambient conditions in air without environmental control. To assess compound stability under X-ray irradiation, four consecutive spectra of single wavelength scans of 18 min each were recorded from freshly prepared samples, the gradual sagging of spectra is indicative of the degradation rate of unprotected neat powder under irradiation in air. The RL spectra given in the main text are averages of the four spectra. All RL spectra were recorded in nominally identical conditions and were normalized to sample amount in moles, the y-axes, although given in “arbitrary units”, can be directly compared between different spectra.

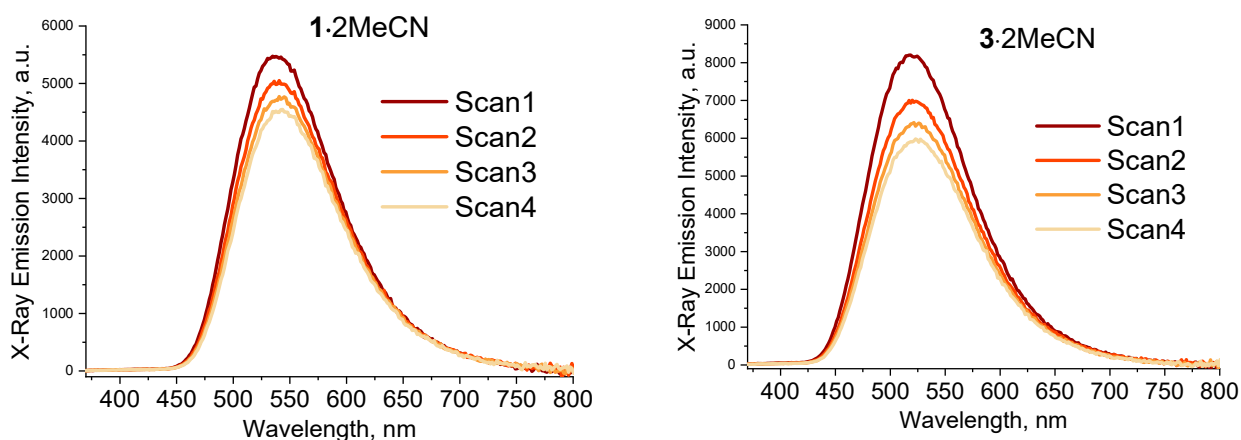

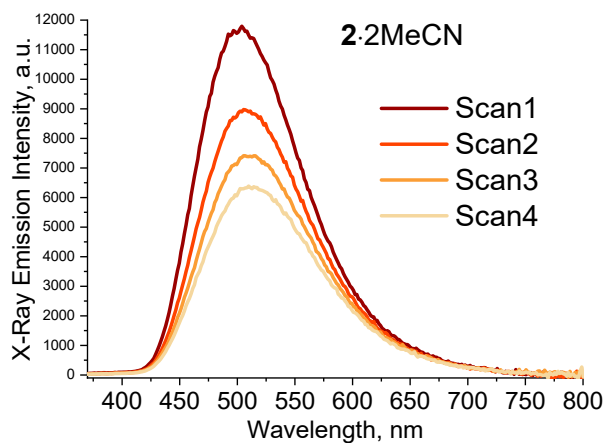

**Figure S14.** Comparison of stability of powders 1–3 toward X-rays (298 K).

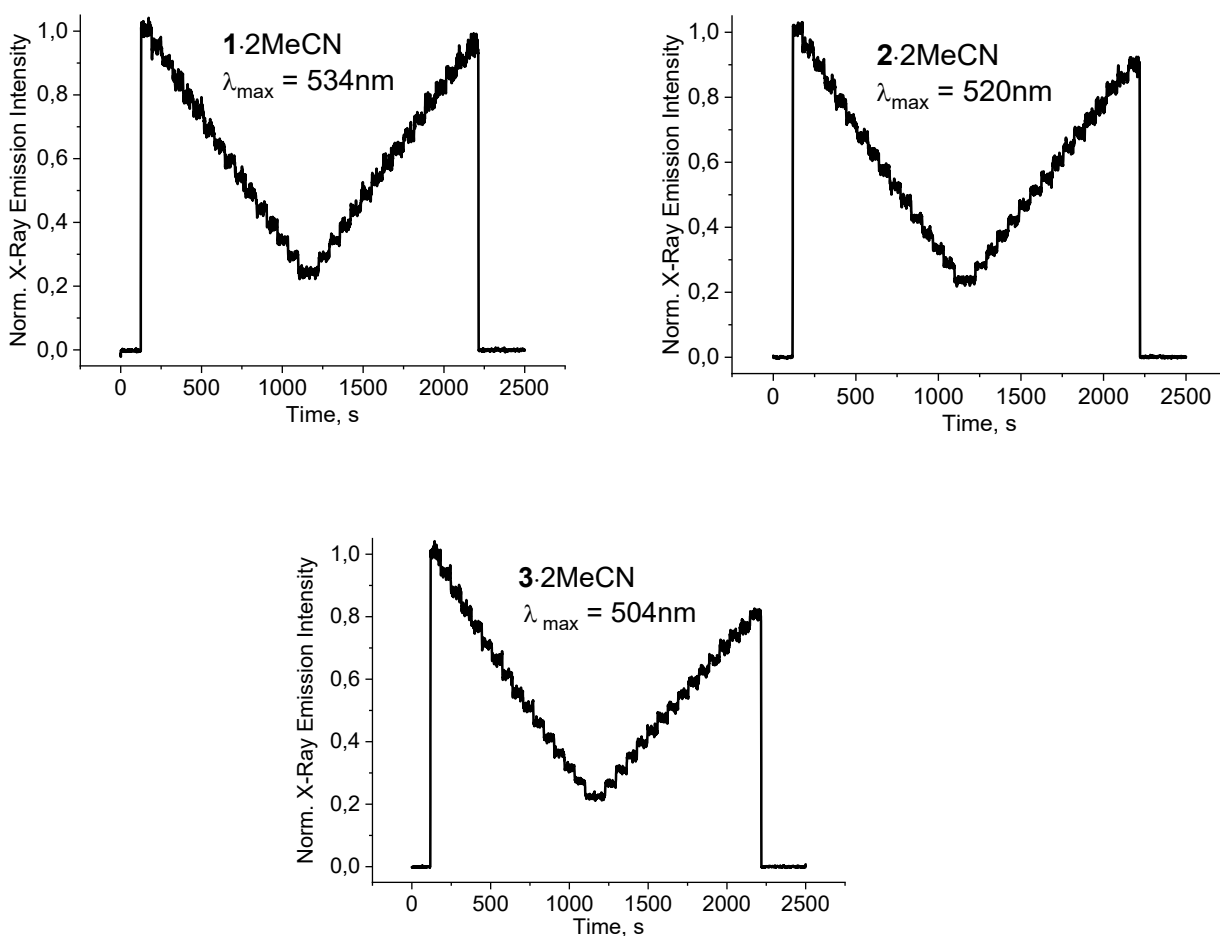

**Figure S15.** Check of linearity of RL response vs. dose rate for 1–3. Detection wavelength was set at emission maximum, and emission intensity as raw signal from detector was recorded while varying anode current of the X-ray tube from nominal (20 mA) down to 5mA and back to 20 mA in 1 mA steps, recording signal for 1 min at each step (2 min at 5 mA). The accelerating voltage was held constant (40 kV), and thus anode current was directly proportional to dose rate, so the produced graph gives the dependence of emission intensity on

dose rate over 4:1 range, clearly demonstrating a linear dose rate response. Upon returning back to nominal anode current the signal does not return exactly to the initial level due to sample degradation, as shown in Fig. S14 above.

## §8. References

1. M. Frisch, G.W. Trucks, H.B. Schlegel, G.E. Scuseria, M.A. Robb, J.R. Cheeseman, G. Scalmani, V. Barone, B. Mennucci, G. Petersson, others, Gaussian 09, revision D. 01, (2009).
2. P. J. Stephens, F. J. Devlin, C. F. Chabalowski and M. J. Frisch, *J. Chem. Phys.*, **1994**, 98, 11623–11627.
3. B.P. Pritchard, D. Altarawy, B. Didier, T.D. Gibson, T.L. Windus, *J. Chem. Inf. Model.*, 2019, **59**, 4814–4820.
4. (a) Bauernschmitt, R. Ahlrichs, *Chem. Phys. Lett.*, **1996**, 256, 454–464; (b) C. Van Caillie, R.D. Amos, *Chem. Phys. Lett.*, **1999**, 308, 249-255; (c) G. Scalmani, M.J. Frisch, B. Mennucci, J. Tomasi, R. Cammi, V. Barone, *J. Chem. Phys.*, **2006**, 124, 094107.
5. E.V. Kalneus, A.R. Melnikov, V.V. Korolev, V.I. Ivannikov and D.V. Stass, *Appl. Magn. Reson.* **2013**, 44, 81–96.
6. D.V. Evtushok, A.R. Melnikov, N.A. Vorotnikova, Y.A. Vorotnikov, A.A. Ryadun, N.V. Kuratieva, K.V. Kozyr, N.R. Obedinskaya, E.I. Kretov, I.N. Novozhilov, Y.V. Mironov, D.V. Stass, O.A. Efremova and M.A. Shestopalov, *Dalton Trans.* **2017**, 46, 11738–11747.
7. D.V. Stass, N.A. Vorotnikova and M.A. Shestopalov, *J. Appl. Phys.* **2021**, 129, 183102.
